# Supplementary material
Source: publisher site journal article supplement (https://www.dovepress.com/get_supplementary_file.php?f=270208.docx)
Supplement: Supplementary file 1 [file get_supplementary_file.php]

**Supplementary Information**

**
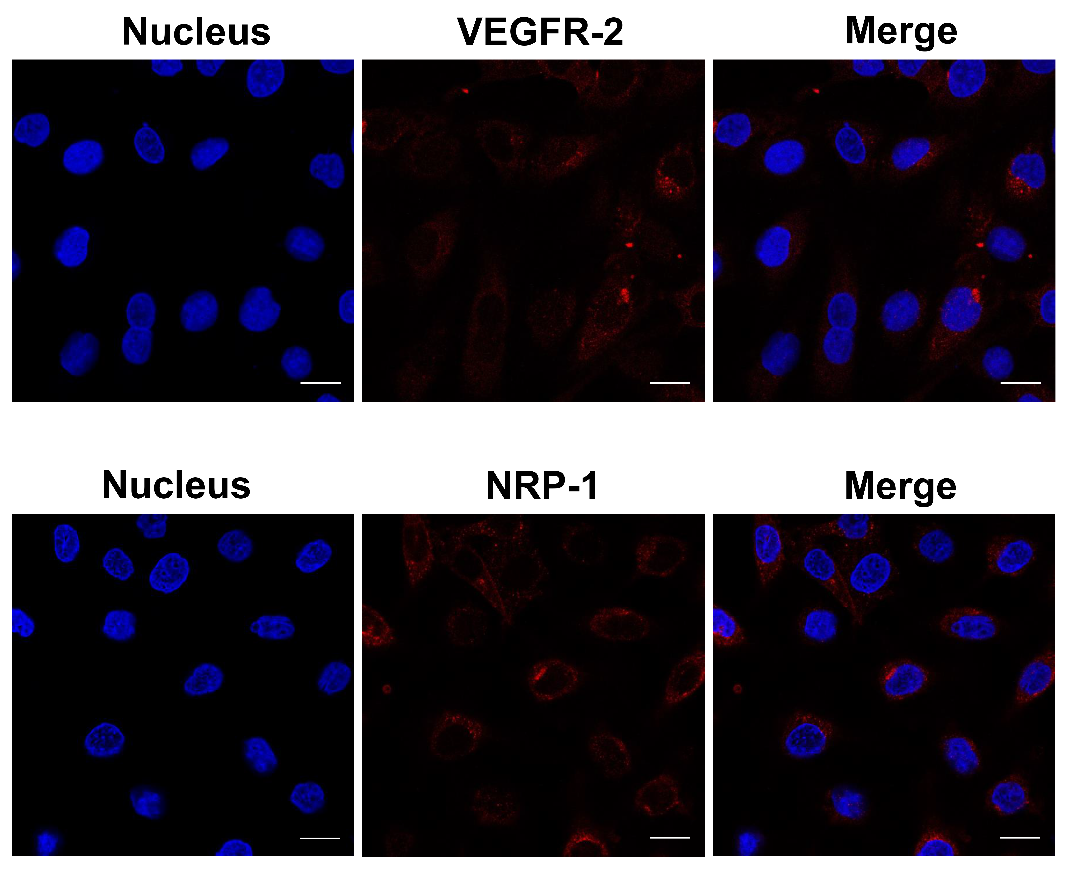
**

**Figure S1** Analysis of VEGFR-2 and NRP-1 expression in HUVECs was carried out by immunofluorescence assay. The HUVECs were fixed with 4% (w/v) paraformaldehyde for 15 min. Then, the fixed cells were separately incubated with rabbit anti-VEGFR-2 (Cell Signaling) and anti-NRP-1 antibodies (Abcam) at 4°C overnight, followed by incubation with Andy Fluor 647-conjugated goat anti-rabbit secondary antibody (GeneCopoeia) for 1 h. The cells were counterstained with Hoechst 33342 and observed under a laser confocal microscope. Blue, Hoechst 33342-stained cell nuclei; red, VEGFR-2 or NRP-1. Bars represent 20 μm.


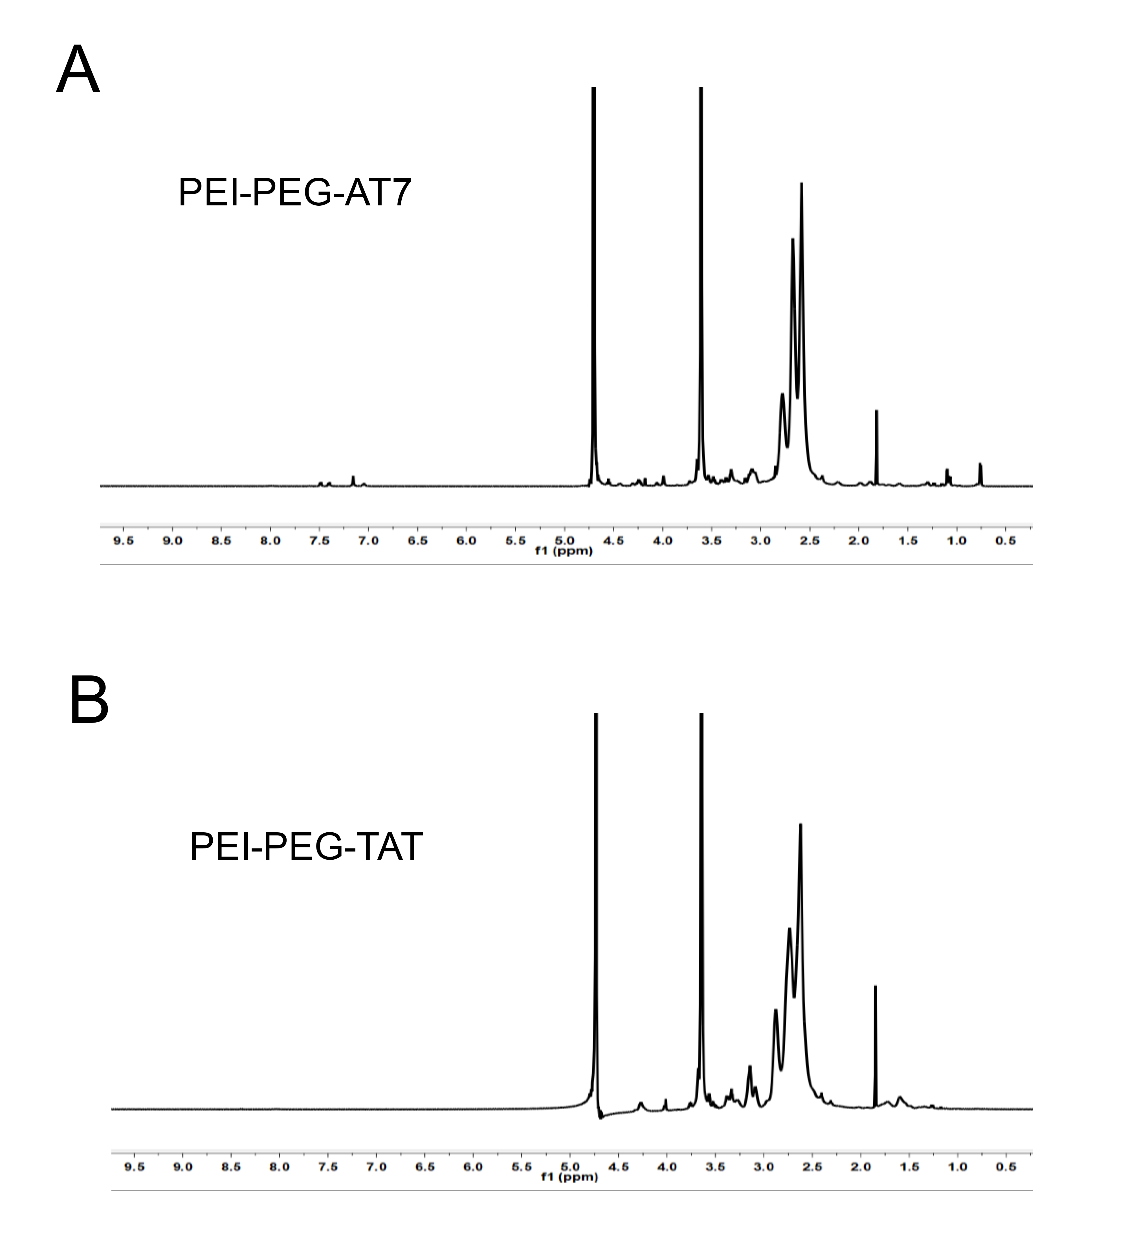


**Figure S2** 1H-NMR spectra of PEI-PEG-AT7 (PPA) and PEI-PEG-TAT (PPT). AT7 or TAT was connected to PEI through a PEG linker. **(A)** The characteristic signals of the aromatic protons at 7.0-7.8 ppm, repeat units of the PEI polymer at 2.5-3.2 ppm and PEG at 3.5-3.7 ppm confirmed the chemical structure of PPA. **(B)** The characteristic signals of the -CH2- of TAT at 1.6-1.9 ppm, repeat units of the PEI polymer at 2.5-3.2 ppm and PEG at 3.5-3.7 ppm confirmed the successful synthesis of PPT. The D2O solvent peak was found at 4.7 ppm.

**Table S1** Size distribution and zeta potential of PEI/pVAXI-En, PPA/pVAXI-En, PPT/pVAXI-En and PPTA/pVAXI-En nanocomplexes.

| Sample | N/P | Size(nm) | PDI | Zeta potential(mV) |
| --- | --- | --- | --- | --- |
| PEI | 8 | 280.3±84.33 | 0.325±0.034 | 21.1±0.80 |
| 12 | 83.4±2.73 | 0.332±0.009 | 23.7±0.82 |
| 16 | 72.6±1.52 | 0.227±0.012 | 26.5±0.54 |
| 20 | 48.6±1.69 | 0.121±0.028 | 38.0±1.65 |
|  | 8 | 211.8±2.30 | 0.265±0.053 | 14.8±0.62 |
| PPA | 12 | 102.1±2.89 | 0.284±0.013 | 17.3±0.45 |
|  | 16 | 79.4±2.24 | 0.286±0.051 | 19.1±1.01 |
|  | 20 | 63.4±2.81 | 0.284±0.010 | 27.3±0.57 |
|  | 8 | 212.3±4.39 | 0.264±0.014 | 15.4±0.71 |
| PPT | 12 | 105.4±1.11 | 0.288±0.018 | 16.3±0.33 |
|  | 16 | 80.1±4.26 | 0.327±0.017 | 21.7±0.82 |
|  | 20 | 64.8±0.20 | 0.282±0.009 | 24.8±0.45 |
|  | 8 | 213.4±11.97 | 0.244±0.025 | 14.8±0.56 |
| PPTA | 12 | 101.6±4.35 | 0.227±0.014 | 17.7±1.39 |
|  | 16 | 83.9±0.35 | 0.341±0.007 | 19.2±0.86 |
|  | 20 | 65.0±0.53 | 0.270±0.027 | 26.6±1.40 |

**Table legend:** The PEI/pVAXI-En, PPA/pVAXI-En, PPT/pVAXI-En and PPTA/pVAXI-En nanocomplexes were prepared at various N/P ratios based on electrostatic interactions. As shown in Table S1, as the N/P ratio increased from 8 to 20, the particle size for all nanocomplexes decreased, while the zeta potential increased gradually. At the same N/P ratio, the PPA/pVAXI-En, PPT/pVAXI-En and PPTA/pVAXI-En nanocomplexes showed slightly larger particle sizes and smaller zeta potentials than the PEI/pVAXI-En nanocomplexes. These results indicated that all of the modified polymers could compress DNA into cationic nanocomplexes and that the hydrophilic PEG moiety and peptides in the modified polymers shielded part of the positive surface charge of PEI.
